# Supplementary material for: Eating Patterns Among Moroccan Medical Students: A Cross-Sectional Study
Source: Research Square preprint supplement (doi:10.21203/rs.3.rs-6969135/v1), 2025-09-22
Supplement: Supplementary file 1 [file 333767dde414dd60e3bf2fcd.docx]

**QUESTIONNAIRE :**

**Sociodemographic Factors:**

1. **Age:** ….. years
2. **Sex:** M ☐  F ☐
3. **Marital Status:** Single ☐  Married ☐  Divorced ☐
4. **Nationality:..**
5. **Medical History:** Yes ☐  . No ☐
    If yes, please specify: …………….
6. **Are you being treated for a chronic illness?** Yes ☐  No ☐
    If yes, please specify:
7. **Medication intake:** Yes ☐  No ☐
    If yes, please specify:
8. **Level of Education:** 1st year ☐  2nd year ☐  3rd year ☐  4th year ☐  5th year ☐  6th year ☐
9. **Have you repeated any academic year?** Yes ☐  No ☐
    If yes, which year(s)?
10. **Socioeconomic Level:**

**10.1** **Mother’s occupation:**
  Civil servant ☐  Shopkeeper ☐  Private sector ☐  Worker ☐ Housewife ☐

**10.2** **Father’s occupation:**
  Civil servant ☐   Shopkeeper ☐  Private sector ☐  Worker ☐  Unemployed ☐

**10.3** **Father’s monthly income:**
  Low (<3000 MAD) ☐  Medium (3000–6000 MAD) ☐  High (>6000 MAD) ☐

**10.4** **Mother’s monthly income:**
  Low (<3000 MAD) ☐  Medium (3000–6000 MAD) ☐  High (>6000 MAD) ☐

1. **Do you receive a government scholarship?** Yes ☐  No ☐
2. **Housing:** Alone ☐  With parents ☐  Shared apartment ☐  University residence ☐  Other (please specify)
3. **Are your parents separated?** Yes ☐  No ☐
4. **Weight:** ______ kg  **Height:** ______ cm

**Lifestyle:**

1 - **Physical activity:** Yes ☐ No ☐
If yes:
 **1-1** **Type of activity:** Jogging activity☐ Football ☐ Other ☐

**1-2Frequency:** Once/week ☐ Twice/week ☐ Three times/week ☐

2 - **Tobacco consumption:** Yes ☐ No ☐

If yes: Year consumption started?.. Weaned: Yes ☐ No ☐

3- **Alcohol consumption:** Yes ☐ No ☐

4- **Drug use:** Yes ☐ No ☐

If yes, which one? :….. What frequency?......

5 - **Did you start consuming tobacco/alcohol/drugs before or during your medical studies?**: …………

6 - **Do you follow a specific diet?** Gluten-free diet ☐ Sugar-free diet ☐ Vegetarian diet ☐

7 - **Have you ever tried a diet to lose weight?** Yes ☐ No ☐ If yes, which one ? …..

**Nutritional Status:**

1. **Number of meals:**
    1 meal ☐  2 meals ☐  3 meals ☐  3 meals + snack ☐
2. **Places where meals are eaten:**

  2.1 **Breakfast:**
   Academy refreshment stand☐ Cafeteria ☐  At home ☐  On the way ☐

  2.2 **Lunch:**
  Academy refreshment stand☐  Cafeteria ☐  At home ☐  On the way ☐

  2.3 **Snack:**
  Academy refreshment stand☐  Cafeteria ☐  At home ☐  On the way ☐

  2.4 **Dinner:**
   Academy refreshment stand☐ Cafeteria ☐  At home ☐  On the way ☐

1. **You do not eat even when you are hungry:** Yes ☐  No ☐
     **3.1 Why?**
      Lack of time ☐  To control overweight/obesity ☐ Financial problems ☐
2. **Have your eating habits changed since joining medical school?**
    Altered in quality☐   Altered in quantity☐  Improved☐
3. **Food frequency:**

  5.1 **How many fruits do you consume per day?**
  1/day ☐  2 /day ☐ 3 or more/day ☐ Other ☐

5.2 **How many vegetables do you consume per day?**

  1/day ☐  2 /day ☐ 3 or more/day ☐ Other ☐

5.3 **How many times per week do you eat fish?**
  Once/week ☐  2 times/week ☐ 3 times /week ☐ more than 3 times /week ☐ Other ☐

5.4 **How many times per week do you eat red meat (1 portion = 50g)?**
  1 portion/week ☐  2 portions/week ☐  More than 3 portions/week ☐  Other ☐

5.5 **Consumption of poultry (1 portion = 50g):**

1 portion/week ☐  2 portions/week ☐  More than 3 portions/week ☐  Other ☐

5.6 **How many times per day do you consume a high-fiber food (whole wheat bread, cereals…):**

  1/day ☐  2 /day ☐ 3 or more/day ☐ Other ☐

5.7 **Daily dairy consumption (100cc = 1 yogurt = 2 portions of cheese):**

1/day ☐  2 /day ☐ 3 or more/day ☐ Other ☐

6- **What type of oil do you use most often:**

Vegetable oil☐ Essential oil☐ Other☐

7-**Meal frequency :**

Breakfast: Never ☐ Sometimes ☐ Daily ☐
Lunch: Never ☐ Sometimes ☐ Daily ☐
Snack: Never ☐ Sometimes ☐ Daily ☐
Dinner: Never ☐ Sometimes ☐ Daily ☐

8**-Snacking between meals:** Sometimes ☐ Daily ☐

9-**Water intake:** More than 2.5L ☐ Less than 2.5L ☐

**Psychological factors:**

1. Do you eat when you feel lonely?
    Never ☐ Sometimes ☐ Often ☐
2. Do you feel completely out of control when you are hungry?
    Never ☐ Sometimes ☐ Often ☐
3. Do you eat until you have a stomach ache?
    Never ☐ Sometimes ☐ Often ☐
4. Do you eat when you feel nervous or upset?
    Never ☐ Sometimes ☐ Often ☐
5. Do you eat when you are bored?
    Never ☐ Sometimes ☐ Often ☐
6. Do you eat when you feel happy?
    Never ☐ Sometimes ☐ Often ☐
